# Supplementary material for: RETRACTED ARTICLE: TMED3 promotes cell proliferation and motility in breast cancer and is negatively modulated by miR-188-3p
Source: Springer Nature journal article supplement (doi:10.1186/s12935-019-0791-4), 2019-03-29
Supplement: MOESM1 [file 16585286]

**sTMED3 promotes cell proliferation and motility in breast cancer and is negatively modulated by miR-188-3p**.

Jing Pei1#, Jing Zhang2#, Xiaowei Yang1, Zhengsheng Wu3, Chenyun Sun1, Zhaorui Wang1, Benzhong Wang1[[1]](#footnote-1)*

1 Department of Breast Surgery, Department of General Surgery, The First Affiliated Hospital of Anhui Medical University, Jixi Road 218, Hefei 230022, Anhui province, PR China;

2 Department of Breast Surgery, The Tumor Hospital of XuZhou, HuanCheng Road 131, XuZhou 221003, Jiangsu province, PR China;

3 Department of pathology, The First Affiliated Hospital of Anhui Medical University, Jixi Road 218, Hefei 230022, Anhui province, PR China;

# contributed equally to this work

**Running title**: TMED3 is negatively modulated by miR-188-3p promoting proliferation.

Corresponding author:

Benzhong Wang

Department of Breast Surgery, Department of General Surgery, The First Affiliated Hospital of Anhui Medical University, Jixi Road 218, Hefei 230022, Anhui province, PR China;

E-mail: [benzhongwang@foxmail.com](mailto:benzhongwang@foxmail.com).

**Materials and methods**

**Quantitative real-time PCR (qRT-PCR)**

Total RNA were isolated using the Trizol (Invitrogen™, Life Technologies Inc, USA) according to the manufacture’s protocol. RNA from each sample was transcribed into cDNA using Revert Aid First Strand cDNA Synthesis Kit (Catalog number: K1621, Thermo Fisher Scientific, [MA](https://www.baidu.com/s?wd=MA&from=1012015a&fenlei=mv6quAkxTZn0IZRqIHckPjm4nH00T1d9nHfLnWwbnW--m1Tkmvfs0ZwV5Hcvrjm3rH6sPfKWUMw85HfYnjn4nH6sgvPsT6KdThsqpZwYTjCEQLGCpyw9Uz4Bmy-bIi4WUvYETgN-TLwGUv3EPWcYrj0Yrjf4Pjn3PH6zPHcY), USA) according to the manufacturer's instructions. qRT-PCR was conducted using Fast Start Universal SYBR Green Master (Rox) (Roche, Germany). TMED2/3/4 PCR detection was performed using SYBR Green method (Catalog number: 4309155, Thermo Fisher Scientific, MA, USA). The PCR cycle consisted of 95°C for 3 min, 95°C for 30 s, 62°C for 30 s (β-actin was 55°C for 30 s), 72°C for 30 s. Expression of TMED3 was normalized to the β-actin to control the variability in expression levels. The relative expression levels were calculated using standard curve method. The sequence of primers was tabulated in supplementary table 1.

**Western blot**

Cells were lysed in RIPA lysis buffer. The protein concentrations were determined using the BCA protein quantitation assay (Bioteke, Beijing, China). Equal amounts of protein (50 μg) were separated on 12% SDS-PAGE gels and were transferred to a PVDF membrane (Millipore, Bedford, MA, USA). The membranes were blocked for 1 h using blocking buffer and then were probed overnight with an anti-TMED2 primary antibody (catalog number: ab97600, Abcam, Cambridge, MA, USA) at 1:1000 dilution; Anti- TMED3 antibody - C-terminal (catalog number: ab173112, Abcam, Cambridge, MA, USA) at 1:500 dilution; Anti-TMED4 antibody (catalog number: ab153814, Abcam, Cambridge, MA, USA) at 1:800 dilution; Anti-β-Tubulin antibody (catalog number: ab15568, Abcam, Cambridge, MA, USA) at 1:1000 dilution at 4℃. The membrane was washed three times for 5 min each time with washing buffer and was incubated with secondary antibody anti-rabbit IgG, Fluorescence-linked antibody (catalog number: 926-32211; LI-COR Biosciences, Lincoln, Nebraska, USA) dilution at 1:10,000, incubation for 1.5 h avoid light at 37℃. Proteins were detected using LI-COR Odyssey Imaging system (LI-COR Biosciences, Lincoln, Nebraska, USA).


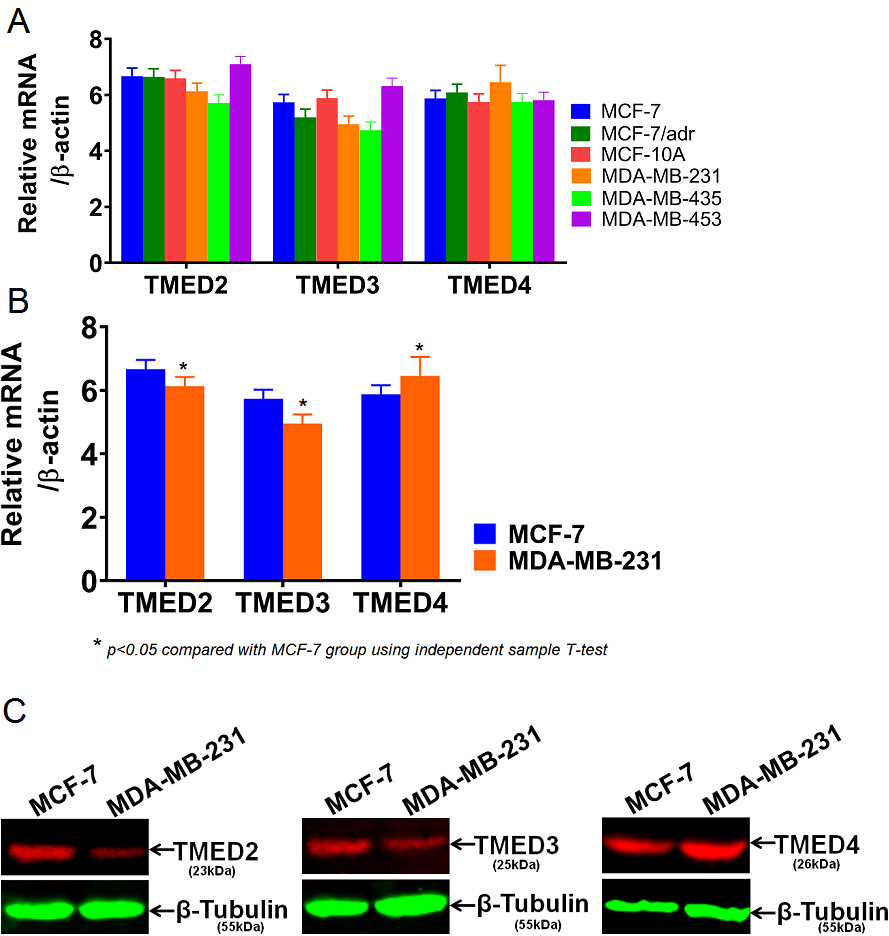


**Figure S1**. **TMED2, TMED3 and TMED4 expression in breast cancer cell lines**. **A**: qRT-PCR detection of TEMD2, TMED3 and TMED4 in a plethora of breast cancer cell lines; **B**: qRT-PCR detection of TEMD2, TMED3 and TMED4 in MCF-7 and MDA-MB-231 cells we used. *p<0.05 compared with MCF-7 group, acting as control; C: western-blot detection of TEMD2, TMED3 and TMED4 in MCF-7 and MDA-MB-231 cells we used. The molecular weight of TMED2, TMED3 and TMED4 was observed to be 23kDa, 25kDa and 26kDa, respectively; β-Tubulin, internal loading control, whose molecular weight was observed to be around 55 kDa.


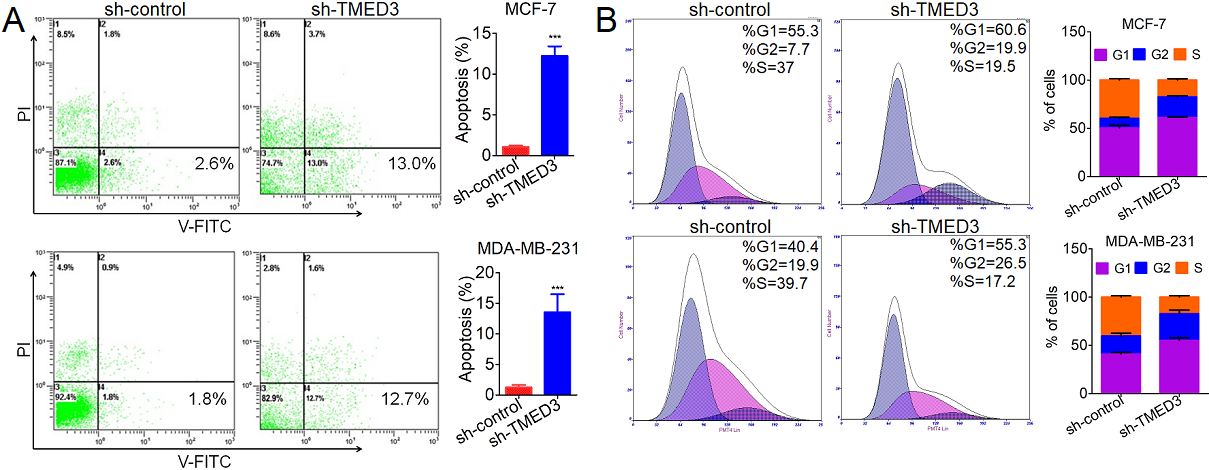


**Figure S2**. **TMED3 prevents apoptosis and increases S phase in breast cancer cell lines**. **A**: stable silencing of TMED3 was found to pronouncedly induce the earlier apoptosis in MCF-7 and MDA-MB-231 cell lines, as shown by Flow cytometry analysis; *** denotes p<0.001 in comparison with control group using independent sample T-test; **B**: Meanwhile, MCF-7 and MDA-MB-231 cells subjected to apoptotic analysis were in parallel subjected to cell cycle analysis. Stable knock-down of TMED3 was able to decrease percent of the S phase while increasing G1 phase. All flow cytometric assays were carried out independently three times and shown were representative figures picked out among candidates.


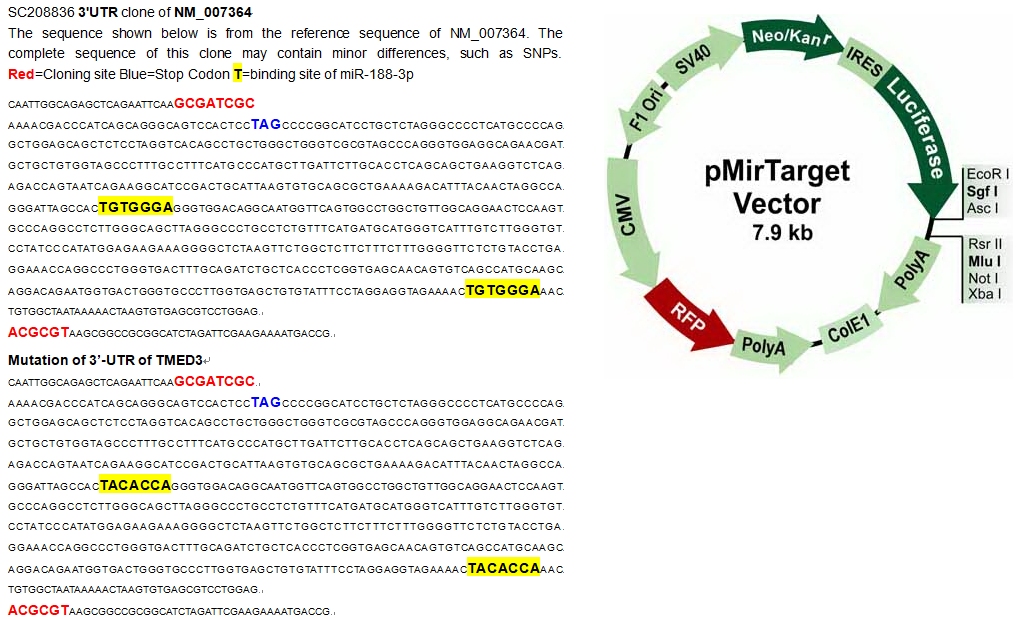


**Figure S3.** Bioinformatic analysis of binding site of miR-188-3p in 3’-UTR sequence of TMED3. T means binding sites of miR-188-3p.

**Table S1**. Sequences of siRNA and qRT-PCR primers involved.

| **Utilization** | **Gene** | | | **Sequence 5'-3'** | | **Sequence 5'-3'** | |  | |  |
| --- | --- | --- | --- | --- | --- | --- | --- | --- | --- | --- |
| siRNA | TMED3-siRNA1 (343) | | | CCCUGGAUUACCAGGUCAUTT | | AUGACCUGGUAAUCCAGGGTT | |  | |  |
| TMED3-siRNA2 (462) | | | GCUGAAGUCAAGGGCGUUUTT | | AAACGCCCUUGACUUCAGCTT | |  | |  |
| TMED3-siRNA3 (719) | | | CCGAGUCUCUUACUGGUCUTT | | AGACCAGUAAGAGACUCGGTT | |  | |  |
| TMED3-scramble | | | GGACAAGUUGAACCUAAUUTT | | AAUUAUUCAGGACUCUUGCTT | |  | |  |
| qRT-PCR | TMED3-forward | | | GGGCGTTTATCAGTTTTGC | | 137 bp | |  | |  |
| TMED3-reverse | | | CCATCTGGGTGAGAGCTGTG | |  | |  |
| TMED2-forward | | | TGCTTCTTTGAGCGGGTCA | | 100 bp | |  | |  |
| TMED2-reverse | | | TCTGGTCCTGTAATCTCCACG | |  | |  |
| TMED4-forward | | | GGTCCATTGCTCAGACTGTCA | | 110 bp | |  | |  |
| TMED4-reverse | | | GGGTCATACAAAGAGGGCACT | |  | |  |
| β-actin forward | | | GCGTGACATTAAGGAGAAGC | | 155 bp | |  | |  |
| β-actin reverse | | | GGTGATGACCTGGCCGTCA | |  | |  |
|  | | **5’hang up** | **STEM** | | **Loop** | | **STEM** | | **3’hang up** | |
| ShTMED3 top | | CCGG | CCCTGGATTACCAGGTCAT | | CTCGAG | | ATGACCTGGTAATCCAGGG | | TTTTTG | |
| ShTMED3 bottom | | AATTCAAAAA | CCCTGGATTACCAGGTCAT | | CTCGAG | | ATGACCTGGTAATCCAGGG | |  | |

1. * Benzhong Wang.

   Department of Breast Surgery, Department of General Surgery, The First Affiliated Hospital of Anhui Medical University, Jixi Road 218, Hefei 230022, Anhui province, PR China; E-mail: benzhongwang@foxmail.com. [↑](#footnote-ref-1)
